# Supplementary material for: Serum Lipidomics Meets Cardiac Magnetic Resonance Imaging: Profiling of Subjects at Risk of Dilated Cardiomyopathy
Source: PubMed Central journal article supplement (PMC3024392; doi:10.1371/journal.pone.0015744), 2011-01-20
Supplement: pone.0015744.s001.pdf [file pone.0015744.s001.pdf]

**Table S1.** Comparisons of mean values of lipid variables in Group 1 vs. Group 2, and Group 3 vs. Group 4, respectively (two-sided *t*-test). Reported fold change is the median of Group 1 or Group 3 divided by the median of Group 2 or Group 4, respectively.

| Lipid variable      | Lamin+              |                     | Lamin-              |                     |
|---------------------|---------------------|---------------------|---------------------|---------------------|
|                     | Group 1 vs. Group 2 | Group 3 vs. Group 4 | Group 1 vs. Group 2 | Group 3 vs. Group 4 |
|                     | <i>P</i> -value     | Fold                | <i>P</i> -value     | Fold                |
| TG(51:3)/TG(51:2)   | 0.0002              | -0.45               | 0.1605              | -0.29               |
| DG(44:7)            | 0.0004              | -0.26               | 0.1304              | -0.24               |
| TG(49:3)            | 0.0006              | -0.99               | 0.0104              | -0.79               |
| PE(40:6)            | 0.0014              | -1.23               | 0.5737              | -0.33               |
| PE(38:5)            | 0.0019              | -1.08               | 0.1275              | -0.47               |
| TG(58:7)/TG(58:6)   | 0.0024              | -0.55               | 0.9591              | -0.01               |
| TG(53:4)/TG(53:3)   | 0.0041              | -0.33               | 0.3823              | -0.26               |
| TG(56:8)/TG(56:7)   | 0.0041              | -0.55               | 0.5737              | -0.14               |
| PE(36:1)            | 0.0052              | -0.52               | 0.4418              | 0.24                |
| PE(40:6)            | 0.0052              | -0.88               | 0.8785              | 0.12                |
| PS(38:2)            | 0.0052              | -0.82               | 0.0499              | -0.52               |
| TG(56:4)/TG(56:3)   | 0.0052              | -0.54               | 0.0379              | -0.29               |
| PS(38:1)            | 0.0066              | -1.04               | 0.6454              | -0.03               |
| PE(34:1)            | 0.0083              | -0.69               | 0.9591              | -0.13               |
| PE(36:3)            | 0.0083              | -0.49               | 0.5737              | -0.38               |
| PE(38:3)            | 0.0083              | -0.55               | 0.3823              | -0.36               |
| PS(38:0)            | 0.0086              | -0.91               | 0.3823              | 0.31                |
| PE(40:4)            | 0.0104              | -0.47               | 1.0000              | -0.08               |
| PS(38:1)            | 0.0104              | -1.06               | 0.9591              | -0.28               |
| PS(40:0)            | 0.0104              | -0.59               | 0.7525              | 0.00                |
| TG(48:4)            | 0.0104              | -0.58               | 0.8785              | -0.03               |
| TG(53:3)/TG(51:3)   | 0.0104              | 0.36                | 0.9591              | -0.13               |
| PC(40:8)/PC(40:7).2 | 0.0128              | 0.59                | 0.8785              | -0.01               |
| PE(36:2)            | 0.0128              | -0.68               | 0.6454              | 0.16                |
| PE(41:8)            | 0.0128              | -0.95               | 0.1049              | 0.57                |
| PE(34:0)            | 0.0151              | -0.23               | 0.3282              | 0.47                |
| PS(38:0)            | 0.0151              | -0.90               | 0.1949              | -0.24               |
| PC(40:5)/PC(40:4)   | 0.0158              | 0.59                | 0.3282              | 0.67                |
| PE(40:6)/PE(38:6e)  | 0.0158              | -0.40               | 0.6454              | -0.03               |
| PE(40:7)/PE(38:7e)  | 0.0158              | -0.28               | 0.6454              | 0.11                |
| PS(32:5e)           | 0.0158              | -0.65               | 0.7209              | 0.16                |
| PS(38:1)            | 0.0158              | -0.97               | 0.9591              | -0.28               |
| PS(40:0)            | 0.0158              | -0.69               | 0.7525              | -0.09               |
| PS(40:0)/PS(38:0).1 | 0.0158              | 0.15                | 0.3823              | 0.21                |
| TG(49:2)/TG(49:1)   | 0.0158              | -0.23               | 0.0030              | -0.79               |
| TG(50:10)           | 0.0158              | -0.64               | 0.0148              | -0.76               |
| PE(26:5)            | 0.0192              | -0.76               | 0.3282              | 0.18                |

|                               |        |       |        |       |
|-------------------------------|--------|-------|--------|-------|
| PE(38:4)                      | 0.0192 | -0.54 | 0.5737 | -0.17 |
| PE(38:6)                      | 0.0192 | -0.65 | 0.7984 | -0.01 |
| PE(40:4)                      | 0.0192 | -0.56 | 0.2345 | -0.36 |
| PE(26:5)                      | 0.0233 | -0.76 | 0.5054 | 0.13  |
| PE(38:5e)                     | 0.0233 | -0.69 | 0.8785 | -0.05 |
| PE(40:6)                      | 0.0233 | -1.12 | 0.7984 | -0.03 |
| TG(54:8)/TG(54:7).1           | 0.0233 | -0.31 | 0.0650 | -0.80 |
| PE(38:4)                      | 0.0278 | -0.51 | 0.5054 | -0.44 |
| PC(38:4)/PC(38:3)             | 0.0281 | -0.40 | 0.2345 | -0.37 |
| PE(38:4)                      | 0.0281 | -0.80 | 0.4418 | -0.44 |
| PE(38:6e)                     | 0.0281 | -0.60 | 0.1605 | 0.18  |
| PS(36:1)                      | 0.0281 | -1.01 | 0.1304 | 0.36  |
| PE(27:5)                      | 0.0336 | -0.64 | 0.1605 | -0.40 |
| PE(27:5)                      | 0.0336 | -0.64 | 0.1605 | -0.44 |
| PE(38:2)                      | 0.0336 | -0.56 | 0.7984 | 0.11  |
| PE(38:6)                      | 0.0336 | -0.84 | 0.7209 | -0.02 |
| PE(40:7)                      | 0.0336 | -1.10 | 1.0000 | 0.15  |
| TG(50:2)/TG(50:1)             | 0.0336 | -1.00 | 0.0030 | -3.22 |
| TG(58:7)                      | 0.0336 | -0.82 | 0.3282 | 0.43  |
| PE(27:5)                      | 0.0385 | -0.89 | 0.1049 | 0.45  |
| PE(38:7e)                     | 0.0385 | -0.68 | 0.9581 | -0.05 |
| SM(d18:1/17:1)                | 0.0408 | -0.26 | 0.8334 | -0.08 |
| PE(35:5e)                     | 0.0451 | -0.58 | 0.2933 | 0.25  |
| TG(56:5)                      | 0.0451 | -1.23 | 0.3282 | 0.37  |
| PC(38:4)                      | 0.0473 | -0.36 | 1.0000 | 0.04  |
| PS(38:1)                      | 0.0473 | -0.61 | 0.0650 | -0.73 |
| TG(49:1)/TG(47:1)             | 0.0473 | 0.30  | 0.3823 | 0.07  |
| TG(51:2)/TG(49:2)             | 0.0473 | 0.35  | 0.1049 | 0.35  |
| TG(52:6)/TG(52:5)             | 0.0473 | -0.26 | 0.7984 | 0.00  |
| TG(58:8)/TG(58:7).2           | 0.0473 | -0.73 | 0.7209 | 0.63  |
| PE(27:5)                      | 0.0557 | -0.85 | 0.1605 | 0.36  |
| PE(36:0)                      | 0.0557 | -0.46 | 0.4418 | 0.21  |
| PE(38:6)                      | 0.0557 | -0.81 | 0.7984 | 0.19  |
| PS(34:6)                      | 0.0557 | -0.68 | 0.7984 | -0.04 |
| PE(40:6e)                     | 0.0565 | -0.49 | 0.2352 | -2.81 |
| PC(38:5e)                     | 0.0568 | -0.51 | 0.0356 | -0.53 |
| PC(38:5e)                     | 0.0568 | -0.11 | 0.0830 | -0.18 |
| LysoPC(22:6)                  | 0.0612 | -0.50 | 0.2345 | 0.37  |
| PE(26:6)                      | 0.0652 | -0.42 | 0.2345 | -0.34 |
| PE(36:2)                      | 0.0652 | -0.58 | 0.6454 | 0.27  |
| PE(38:5)                      | 0.0652 | -0.99 | 0.1033 | -0.57 |
| PS(38:3e)                     | 0.0652 | -0.67 | 0.8785 | 0.06  |
| PS(40:7e)                     | 0.0652 | -0.88 | 0.3282 | -0.28 |
| SM(d18:1/16:1)/SM(d18:1/16:0) | 0.0652 | -0.15 | 0.1049 | 0.25  |
| TG(58:8)                      | 0.0652 | -1.73 | 0.5054 | 0.36  |
| PC(34:4)/PC(34:3)             | 0.0759 | -0.51 | 0.6454 | -0.18 |

|                                 |        |       |        |       |
|---------------------------------|--------|-------|--------|-------|
| PC(34:5)/PC(34:4).1             | 0.0759 | -0.36 | 0.7984 | -0.10 |
| PC(36:4)                        | 0.0759 | -0.24 | 0.7984 | -0.15 |
| PC(36:5)                        | 0.0759 | -0.56 | 0.1049 | 0.46  |
| PC(40:7)                        | 0.0759 | -0.34 | 0.1049 | -0.43 |
| PC(40:7)/PC(38:7)               | 0.0759 | -0.91 | 0.2345 | -0.17 |
| PE(38:1)                        | 0.0759 | -0.41 | 0.3282 | 0.25  |
| PE(38:3)/PE(36:3).1             | 0.0759 | 0.49  | 0.2345 | 0.34  |
| PG(38:4)/PG(36:4)               | 0.0759 | -0.31 | 0.7209 | 0.04  |
| PS(41:6)                        | 0.0759 | -0.38 | 0.8785 | 0.09  |
| TG(53:3)/TG(53:2)               | 0.0759 | -0.29 | 0.0379 | -0.18 |
| TG(42:0)                        | 0.0760 | -1.39 | 0.7209 | -0.05 |
| PE(36:3)                        | 0.0761 | -0.33 | 0.2786 | -0.13 |
| PC(27:5)                        | 0.0874 | 0.48  | 0.0146 | -0.78 |
| Cer(d18:1/24:1)/Cer(d18:1/24:0) | 0.0879 | -0.26 | 0.3282 | -0.24 |
| PA(41:8e)                       | 0.0879 | 0.67  | 0.0830 | -0.32 |
| PE(38:5)/PE(38:4)               | 0.0879 | -0.81 | 0.5054 | -0.31 |
| PE(40:4)                        | 0.0879 | -0.35 | 0.5737 | -0.24 |
| PE(40:4)/PE(40:3)               | 0.0879 | -1.04 | 0.4418 | 0.33  |
| PE(40:6)/PE(38:6).1             | 0.0879 | -0.22 | 0.7209 | 0.07  |
| PI(38:4)/PI(38:3)               | 0.0879 | -0.25 | 0.0830 | 0.21  |
| PS(27:5)                        | 0.0879 | -0.44 | 0.9591 | 0.01  |
| TG(51:1)/TG(49:1)               | 0.0879 | 0.28  | 0.6454 | 0.16  |
| TG(56:5)                        | 0.0879 | -0.99 | 0.0830 | -0.65 |
| TG(56:6)                        | 0.0879 | -1.08 | 0.1949 | 0.60  |
| TG(58:10)                       | 0.0879 | -1.13 | 0.5737 | 0.05  |
| PC(32:1)/PC(32:0)               | 0.1006 | 0.32  | 0.2345 | 0.34  |
| PA(27:1)                        | 0.1014 | -0.37 | 1.0000 | 0.05  |
| PC(40:5)/PC(38:5e)              | 0.1014 | 0.73  | 0.1412 | 0.82  |
| PE(27:5)                        | 0.1014 | -0.57 | 0.1889 | -0.59 |
| PE(40:7e)                       | 0.1014 | -0.48 | 0.7130 | -0.14 |
| TG(58:8)/TG(58:7).1             | 0.1014 | -0.49 | 0.5737 | 0.13  |
| TG(58:9)                        | 0.1014 | -1.38 | 0.7209 | 0.16  |
| PE(38:3)                        | 0.1148 | -0.26 | 0.4619 | 0.17  |
| PS(27:6)                        | 0.1149 | -0.28 | 0.7209 | -0.23 |
| PC(40:8)/PC(40:7)               | 0.1164 | 0.96  | 0.9591 | -0.08 |
| TG(54:8)                        | 0.1164 | -0.94 | 0.4418 | 0.24  |
| PC(34:2)/PC(34:1)               | 0.1330 | -0.22 | 0.4418 | -0.21 |
| PE(25:5)                        | 0.1330 | -0.21 | 0.5054 | -0.28 |
| PS(41:7)                        | 0.1330 | -0.55 | 0.1605 | -0.55 |
| TG(50:1)/TG(48:1)               | 0.1330 | 0.41  | 0.3282 | -0.16 |
| TG(56:8)                        | 0.1330 | -0.62 | 0.3282 | 0.58  |
| TG(58:7)                        | 0.1330 | -0.45 | 0.3181 | 0.45  |
| DG(50:2e)                       | 0.1394 | -0.75 | 0.8334 | -0.12 |
| PE(40:8e)                       | 0.1394 | -0.33 | 1.0000 | -0.13 |
| TG(44:0)/TG(42:0)               | 0.1394 | 0.81  | 0.3823 | 0.88  |
| LysoPC(20:3)                    | 0.1513 | -0.24 | 0.9163 | -0.19 |

|                     |        |       |        |       |
|---------------------|--------|-------|--------|-------|
| PC(25:4)            | 0.1513 | -0.44 | 0.2698 | 0.08  |
| PC(32:2)/PC(32:1)   | 0.1513 | -0.21 | 0.4418 | -0.19 |
| PC(36:4)/PC(34:4)   | 0.1513 | 0.23  | 0.1605 | -0.71 |
| PC(38:5)/PC(38:4)   | 0.1513 | 0.11  | 0.4418 | 0.11  |
| PC(40:5)/PC(38:5).1 | 0.1513 | 0.32  | 0.3282 | 0.93  |
| PC(40:7)/PC(40:6)   | 0.1513 | -0.84 | 0.0650 | -0.53 |
| PE(34:1)/PE(34:0)   | 0.1513 | -0.18 | 0.6454 | -0.14 |
| PE(34:4e)           | 0.1513 | -0.41 | 0.2345 | -0.29 |
| PE(36:3e)           | 0.1513 | -0.51 | 0.6454 | 0.01  |
| PE(40:3)/PE(38:3).2 | 0.1513 | 0.74  | 0.6454 | -0.27 |
| PS(40:0)/PS(38:0)   | 0.1513 | 0.24  | 0.3823 | -0.36 |
| TG(50:1)            | 0.1513 | 0.82  | 0.0379 | 1.93  |
| TG(50:3)/TG(50:2).1 | 0.1513 | -0.19 | 0.3282 | -0.14 |
| TG(52:3)/TG(52:2)   | 0.1513 | -0.06 | 0.3823 | -0.07 |
| TG(54:6)/TG(54:5).1 | 0.1513 | -0.34 | 0.8785 | 0.11  |
| TG(54:7)/TG(54:6)   | 0.1513 | -0.36 | 0.5737 | 0.01  |
| TG(54:7)/TG(54:6).1 | 0.1513 | -0.36 | 0.5054 | 0.41  |
| TG(56:8)            | 0.1513 | -0.54 | 0.3282 | 0.58  |
| PA(34:0)            | 0.1567 | 0.07  | 0.1304 | -0.13 |
| PC(40:6)            | 0.1579 | -0.49 | 0.1605 | 0.35  |
| TG(43:6)            | 0.1579 | -0.78 | 0.1033 | 0.50  |
| PC(40:7)            | 0.1713 | -0.94 | 0.1605 | -0.47 |
| PC(40:7)/PC(38:7).2 | 0.1713 | -0.34 | 0.5737 | 0.17  |
| PE(36:1)            | 0.1713 | -0.55 | 0.1605 | 0.45  |
| PE(38:5)            | 0.1713 | -0.56 | 0.0207 | -0.66 |
| PE(38:5)/PE(38:4).1 | 0.1713 | -0.58 | 0.6454 | -0.31 |
| TG(42:1)/TG(42:0)   | 0.1713 | 1.15  | 0.4418 | 1.16  |
| TG(46:1)/TG(46:0)   | 0.1713 | 0.34  | 0.8785 | -0.13 |
| TG(54:8)/TG(54:7)   | 0.1713 | -0.22 | 0.4418 | -0.51 |
| TG(56:5)/TG(54:5).1 | 0.1713 | -0.82 | 0.0030 | -0.81 |
| TG(56:9)            | 0.1713 | -0.90 | 0.1719 | 0.24  |
| TG(58:10)/TG(58:9)  | 0.1713 | -0.20 | 0.8785 | 0.00  |
| PC(36:6)            | 0.1780 | -0.45 | 0.3435 | 0.11  |
| PC(27:5)            | 0.1781 | -0.39 | 1.0000 | -0.02 |
| LysoPC(20:4)        | 0.1890 | -0.27 | 0.8785 | -0.03 |
| TG(54:7)            | 0.1890 | -0.53 | 0.1049 | 0.76  |
| PC(38:4)/PC(36:4)   | 0.1932 | -0.43 | 0.4418 | 0.58  |
| PC(38:6)            | 0.1932 | -0.43 | 0.5737 | 0.03  |
| PC(40:7)/PC(38:7).1 | 0.1932 | -0.70 | 0.5737 | 0.17  |
| PC(40:8)            | 0.1932 | -0.79 | 0.1605 | -0.22 |
| PE(27:5)/PE(25:5)   | 0.1932 | -0.14 | 0.4418 | -0.11 |
| PE(36:3)/PE(36:2).1 | 0.1932 | 0.25  | 0.3823 | -0.32 |
| PE(40:4)/PE(38:4)   | 0.1932 | -0.44 | 0.6454 | 0.22  |
| PE(40:6)/PE(38:6)   | 0.1932 | -0.16 | 0.7984 | 0.04  |
| PS(30:0)            | 0.1932 | -0.29 | 0.1304 | -0.22 |
| PS(40:7e)           | 0.1932 | -0.30 | 0.3282 | -0.28 |

|                               |        |       |        |       |
|-------------------------------|--------|-------|--------|-------|
| TG(42:1)/TG(42:0).1           | 0.1932 | 0.29  | 0.1304 | 0.80  |
| TG(44:0)/TG(42:0).1           | 0.1932 | 0.04  | 0.0379 | 0.24  |
| TG(48:3)/TG(48:2)             | 0.1932 | -0.34 | 1.0000 | -0.05 |
| TG(53:5)/TG(53:4)             | 0.1932 | -0.13 | 0.1049 | -0.49 |
| TG(54:2)/TG(52:2)             | 0.1932 | 0.55  | 0.0047 | 0.77  |
| TG(54:3)/TG(54:2)             | 0.1932 | -0.12 | 0.0011 | -1.33 |
| TG(56:7)                      | 0.1932 | -1.11 | 0.2786 | 0.70  |
| TG(56:7)/TG(54:7)             | 0.1932 | 0.26  | 1.0000 | 0.13  |
| PE(38:2)                      | 0.2003 | -0.18 | 0.5737 | -0.03 |
| SM(d18:1/17:0)                | 0.2116 | -0.20 | 1.0000 | 0.12  |
| PC(34:4)                      | 0.2119 | -0.25 | 0.8746 | -0.05 |
| PG(38:4)                      | 0.2120 | -0.22 | 0.3823 | 0.11  |
| PC(34:5)/PC(34:4)             | 0.2169 | 0.26  | 0.4418 | 0.17  |
| PC(36:3)/PC(36:2)             | 0.2169 | 0.15  | 0.1949 | 0.10  |
| PE(38:3)                      | 0.2169 | -0.42 | 0.9591 | 0.12  |
| PE(38:6)/PE(38:5).2           | 0.2169 | 0.25  | 0.2786 | 0.51  |
| SM(d18:1/24:3)/SM(d18:1/24:2) | 0.2169 | -0.08 | 0.3282 | 0.39  |
| TG(50:0)/TG(48:0)             | 0.2169 | 0.14  | 0.7209 | 0.20  |
| TG(52:2)/TG(50:2)             | 0.2169 | 0.71  | 0.0148 | 1.81  |
| TG(56:4)/TG(54:4)             | 0.2169 | -0.58 | 0.4418 | 0.02  |
| TG(56:4)/TG(54:4).1           | 0.2169 | -0.58 | 0.4418 | 0.02  |
| PC(28:2)                      | 0.2234 | -0.25 | 0.2933 | 0.31  |
| SM(d18:1/25:4)                | 0.2366 | -0.30 | 0.7209 | 0.26  |
| LysoPC(16:0)                  | 0.2426 | -0.20 | 0.5737 | 0.09  |
| LysoPC(20:4)/LysoPC(20:3).1   | 0.2426 | 0.26  | 0.9591 | 0.18  |
| PC(36:4)/PC(34:4).1           | 0.2426 | -0.21 | 0.0499 | -0.84 |
| PC(38:6)                      | 0.2426 | -0.41 | 0.4418 | 0.30  |
| PC(40:5)/PC(38:5e).1          | 0.2426 | 0.46  | 0.1304 | 0.41  |
| PE(36:1)/PE(34:1)             | 0.2426 | 0.19  | 0.3282 | 0.36  |
| PE(40:6)/PE(38:6).2           | 0.2426 | -0.10 | 0.9591 | -0.02 |
| PE(40:7)/PE(40:6).2           | 0.2426 | -0.14 | 0.5737 | 0.10  |
| PS(38:2)/PS(38:1).3           | 0.2426 | -0.05 | 0.5737 | -0.06 |
| SM(d18:1/16:1)                | 0.2426 | -0.09 | 0.1605 | 0.40  |
| SM(d18:1/18:0)                | 0.2426 | -0.14 | 0.6454 | -0.09 |
| SM(d18:1/23:1)/SM(d18:1/23:0) | 0.2426 | 0.09  | 0.9591 | -0.06 |
| TG(46:1)/TG(44:1)             | 0.2426 | 0.49  | 0.5737 | -0.11 |
| TG(51:3)/TG(49:3)             | 0.2426 | 0.43  | 0.0281 | 1.98  |
| TG(56:5)/TG(54:5)             | 0.2426 | -0.26 | 0.0830 | -1.26 |
| TG(58:7)                      | 0.2426 | -0.65 | 0.3282 | 0.52  |
| PI(38:1)                      | 0.2633 | -0.18 | 0.3141 | -0.04 |
| SM(d18:1/17:1)/SM(d18:1/17:0) | 0.2638 | -0.10 | 0.6454 | 0.03  |
| TG(52:6)                      | 0.2642 | -0.48 | 0.1049 | 0.45  |
| LysoPC(18:0)                  | 0.2703 | -0.27 | 0.8785 | -0.13 |
| PC(32:0)                      | 0.2703 | -0.20 | 0.1605 | 0.22  |
| PC(38:5)/PC(36:5).1           | 0.2703 | 0.42  | 0.0830 | -0.57 |
| PE(27:5)                      | 0.2703 | -0.24 | 0.8785 | -0.05 |

|                                   |        |       |        |       |
|-----------------------------------|--------|-------|--------|-------|
| PE(40:3)/PE(38:3).1               | 0.2703 | 0.82  | 0.0650 | -0.68 |
| TG(46:2)/TG(46:1)                 | 0.2703 | -0.14 | 0.2786 | -0.22 |
| TG(52:2)/TG(52:1)                 | 0.2703 | -0.15 | 0.0104 | -1.57 |
| TG(53:2)/TG(51:2)                 | 0.2703 | 0.17  | 0.6454 | 0.09  |
| TG(58:7)/TG(56:7)                 | 0.2703 | -0.38 | 0.2345 | -0.50 |
| TG(50:2)                          | 0.2933 | 0.06  | 0.0054 | -1.05 |
| PC(38:7)                          | 0.3000 | -0.26 | 0.0379 | -0.46 |
| PC(40:4)                          | 0.3000 | -0.30 | 0.1949 | -0.27 |
| SM(d18:1/24:3)                    | 0.3000 | -0.21 | 0.1605 | 0.48  |
| TG(48:1)/TG(48:0)                 | 0.3000 | 0.42  | 0.5054 | -0.19 |
| TG(49:3)/TG(49:2)                 | 0.3000 | -0.66 | 0.0379 | -2.04 |
| TG(50:5)/TG(50:4)                 | 0.3000 | -0.09 | 0.0207 | -0.40 |
| TG(54:6)/TG(52:6)                 | 0.3000 | 0.17  | 0.8785 | -0.27 |
| TG(56:5)/TG(56:4).1               | 0.3000 | -0.73 | 0.0499 | -1.07 |
| TG(56:7)/TG(54:7).1               | 0.3000 | 0.28  | 0.9591 | 0.06  |
| TG(54:1)                          | 0.3086 | 0.53  | 0.0499 | 2.60  |
| Cer(d18:1/24:0)/Cer(d18:1/22:0)   | 0.3316 | 0.08  | 0.3282 | 0.16  |
| LysoPC(20:5)/LysoPC(20:4).1       | 0.3316 | 0.32  | 0.8785 | 0.16  |
| PC(32:5)                          | 0.3316 | -0.08 | 0.2470 | 0.58  |
| PC(38:5)                          | 0.3316 | -0.38 | 0.3823 | 0.06  |
| PC(40:5)/PC(38:5)                 | 0.3316 | 0.09  | 0.7984 | 0.09  |
| PE(38:6)/PE(38:5)                 | 0.3316 | 0.82  | 0.1949 | 0.51  |
| PE(40:3)/PE(38:3)                 | 0.3316 | 0.59  | 0.0148 | -0.61 |
| TG(50:2)/TG(48:2)                 | 0.3316 | -1.12 | 0.0070 | -2.86 |
| TG(52:1)/TG(52:0)                 | 0.3316 | 0.11  | 0.3282 | 0.28  |
| TG(54:2)                          | 0.3316 | 0.30  | 0.0281 | 2.02  |
| TG(58:8)/TG(58:7)                 | 0.3316 | -0.39 | 0.8785 | 0.52  |
| LysoPC(18:0)                      | 0.3408 | -0.20 | 0.9163 | 0.01  |
| TG(56:2)                          | 0.3408 | 0.24  | 0.0047 | 1.61  |
| PC(40:7)                          | 0.3409 | -0.34 | 0.2786 | 0.12  |
| PG(36:2)/PG(34:2)                 | 0.3409 | -0.17 | 0.5737 | -0.24 |
| SM(d18:1/18:1)                    | 0.3577 | -0.06 | 1.0000 | 0.17  |
| PC(38:7)/PC(38:6)                 | 0.3653 | 0.69  | 0.5737 | -0.27 |
| PE(38:3)/PE(38:2).1               | 0.3653 | 0.07  | 0.7209 | -0.14 |
| TG(48:2)/TG(48:1)                 | 0.3653 | -0.15 | 0.0070 | -0.82 |
| TG(54:7)                          | 0.3653 | -0.74 | 0.1049 | 1.12  |
| TG(58:8)/TG(56:8).1               | 0.3653 | -0.08 | 0.2786 | -0.21 |
| Cer(d18:1/17:0)                   | 0.3752 | 0.03  | 0.2345 | -0.13 |
| PA(27:1)                          | 0.3752 | -0.06 | 0.1889 | -0.32 |
| PC(26:4)                          | 0.3930 | -0.11 | 0.0830 | -0.61 |
| Cer(d18:1/24:1)/Cer(d18:1/24:0).1 | 0.4009 | -0.44 | 0.8785 | 0.05  |
| LysoPA(25:5)                      | 0.4009 | 0.55  | 0.1949 | -0.14 |
| PC(38:3e)                         | 0.4009 | 0.49  | 0.2345 | -0.26 |
| PC(40:7)/PC(40:6).1               | 0.4009 | -0.58 | 0.0207 | -1.02 |
| PE(38:5)/PE(38:4).3               | 0.4009 | -0.52 | 0.1949 | -0.32 |
| PE(40:6e)                         | 0.4009 | -0.49 | 0.2345 | 0.39  |

|                               |        |       |        |       |
|-------------------------------|--------|-------|--------|-------|
| PS(38:1)/PS(38:0).1           | 0.4009 | -0.29 | 0.1049 | 0.31  |
| SM(d18:1/18:3)                | 0.4009 | -0.09 | 0.7209 | -0.02 |
| SM(d18:1/24:4)/SM(d18:1/24:3) | 0.4009 | 0.13  | 0.1605 | -0.32 |
| TG(52:1)                      | 0.4009 | 0.17  | 0.0499 | 2.53  |
| TG(53:5)                      | 0.4009 | -0.66 | 0.2072 | 0.32  |
| TG(56:6)/TG(54:6).1           | 0.4009 | -0.17 | 0.9591 | -0.08 |
| TG(56:6)/TG(56:5)             | 0.4009 | 0.19  | 0.0047 | 1.08  |
| TG(56:6)/TG(56:5).1           | 0.4009 | 0.07  | 0.3282 | 0.07  |
| TG(58:6)/TG(56:6)             | 0.4009 | 0.15  | 0.5054 | -0.18 |
| SM(d18:1/18:2)                | 0.4116 | -0.22 | 0.5271 | -0.07 |
| SM(d18:1/26:5)                | 0.4116 | -0.37 | 0.3282 | -0.17 |
| TG(47:1)                      | 0.4116 | -0.48 | 0.1605 | 1.45  |
| MG(20:1)                      | 0.4306 | 0.12  | 0.2933 | -0.09 |
| Cer(d18:1/25:1)               | 0.4385 | -0.31 | 0.2933 | 0.41  |
| PA(41:7)                      | 0.4385 | 0.29  | 0.0281 | -0.17 |
| PC(36:6)/PC(36:5)             | 0.4385 | -0.33 | 0.8785 | 0.03  |
| PC(36:6)/PC(36:5).1           | 0.4385 | 0.20  | 0.3823 | -0.14 |
| PC(38:7)/PC(38:6).2           | 0.4385 | 0.51  | 0.1304 | -0.55 |
| PC(40:6)/PC(38:6).2           | 0.4385 | 0.34  | 0.7984 | -0.06 |
| PC(40:6)/PC(40:5)             | 0.4385 | -0.16 | 0.5054 | -0.11 |
| PC(40:6)/PC(40:5).1           | 0.4385 | 0.29  | 0.2345 | -0.10 |
| PE(36:3)/PE(36:2)             | 0.4385 | 0.28  | 0.3282 | -0.47 |
| SM(d18:1/18:2)/SM(d18:1/18:1) | 0.4385 | 0.09  | 0.2345 | -0.24 |
| SM(d18:1/26:5)/SM(d18:1/26:4) | 0.4385 | -0.11 | 0.0650 | -0.18 |
| TG(48:1)                      | 0.4385 | 0.51  | 0.0148 | 2.35  |
| TG(50:3)/TG(50:2)             | 0.4385 | 0.35  | 0.0207 | 1.96  |
| TG(52:5)/TG(50:5)             | 0.4385 | 0.30  | 0.4418 | 0.43  |
| TG(54:3)/TG(52:3)             | 0.4385 | -0.02 | 0.7209 | -0.12 |
| PA(34:0)                      | 0.4779 | 0.08  | 0.9591 | 0.09  |
| PC(38:7)                      | 0.4779 | -0.40 | 0.0379 | -0.46 |
| PE(38:4)                      | 0.4779 | -0.30 | 0.6454 | -0.10 |
| PS(38:2)/PS(38:1)             | 0.4779 | 0.55  | 0.0499 | -0.47 |
| SM(d18:1/14:0)                | 0.4779 | -0.15 | 0.4619 | 0.21  |
| SM(d18:1/15:0)                | 0.4779 | -0.10 | 0.7984 | 0.14  |
| SM(d18:1/25:1)                | 0.4779 | -0.12 | 0.8785 | 0.02  |
| TG(44:1)/TG(42:1)             | 0.4779 | -0.08 | 0.8785 | -0.39 |
| TG(52:5)                      | 0.4779 | -0.12 | 0.1605 | 0.77  |
| TG(54:5)                      | 0.4779 | -0.38 | 0.3282 | 0.60  |
| TG(56:4)                      | 0.4779 | -0.07 | 0.2786 | 0.72  |
| TG(56:6)/TG(54:6)             | 0.4779 | -0.16 | 0.9591 | 0.07  |
| TG(56:7)/TG(56:6)             | 0.4779 | 0.30  | 0.4418 | 0.49  |
| TG(58:9)/TG(58:8)             | 0.4779 | -0.11 | 0.0379 | -0.19 |
| Cer(d18:1/24:0)               | 0.4904 | 0.09  | 0.1889 | 0.47  |
| PC(34:5)                      | 0.4904 | -0.30 | 0.4302 | 0.10  |
| TG(53:4)                      | 0.4904 | -0.49 | 0.1049 | 0.65  |
| PC(32:5)                      | 0.5112 | -0.09 | 0.5992 | -0.07 |

|                               |        |       |        |       |
|-------------------------------|--------|-------|--------|-------|
| PA(38:7e)                     | 0.5113 | 0.19  | 0.0207 | -0.21 |
| SM(d18:0/20:4)                | 0.5113 | -0.42 | 0.0927 | -0.29 |
| LysoPC(18:1)/LysoPC(18:0).1   | 0.5190 | 0.08  | 0.4418 | -0.22 |
| PC(36:2)/PC(34:2)             | 0.5190 | -0.08 | 0.7209 | 0.07  |
| PC(36:5)/PC(36:4).1           | 0.5190 | 0.21  | 0.5054 | 0.31  |
| PC(40:6)/PC(38:6)             | 0.5190 | 0.28  | 0.7984 | -0.15 |
| PE(38:2)/PE(36:2)             | 0.5190 | 0.12  | 0.8785 | -0.18 |
| PS(38:1)/PS(36:1)             | 0.5190 | -0.15 | 0.4418 | -0.26 |
| PS(38:1)/PS(38:0)             | 0.5190 | 0.01  | 0.5737 | -0.17 |
| PS(38:2)/PS(38:1).1           | 0.5190 | 0.15  | 0.1049 | -0.32 |
| SM(d18:1/16:0)                | 0.5190 | -0.18 | 0.7209 | 0.25  |
| TG(48:4)/TG(48:3)             | 0.5190 | -0.63 | 0.3282 | -0.98 |
| TG(50:1)/TG(50:0)             | 0.5190 | 0.45  | 0.1949 | -0.60 |
| TG(51:3)                      | 0.5190 | -0.24 | 0.1049 | 0.60  |
| TG(54:4)/TG(54:3)             | 0.5190 | -0.10 | 0.5737 | -0.05 |
| TG(54:6)                      | 0.5190 | -0.22 | 0.1049 | 0.64  |
| TG(56:3)/TG(56:2)             | 0.5190 | -0.08 | 0.0070 | -0.59 |
| TG(56:7)                      | 0.5190 | -0.37 | 0.1605 | 0.40  |
| TG(56:8)/TG(56:7).1           | 0.5190 | -0.07 | 0.8785 | 0.10  |
| TG(51:1)                      | 0.5326 | 0.05  | 0.0281 | 2.04  |
| PG(40:3e)                     | 0.5543 | 0.22  | 0.2072 | 0.60  |
| LysoPC(18:2)                  | 0.5619 | -0.13 | 0.2072 | -0.26 |
| LysoPC(18:3)                  | 0.5619 | -0.08 | 0.1605 | 0.27  |
| PC(34:5)/PC(32:5)             | 0.5619 | -0.12 | 0.5054 | 0.15  |
| PC(36:2)/PC(36:1)             | 0.5619 | -0.05 | 0.3282 | -0.43 |
| PC(36:5)/PC(36:4)             | 0.5619 | -0.10 | 0.5737 | 0.03  |
| PC(38:2)/PC(36:2)             | 0.5619 | -0.01 | 0.1304 | 0.49  |
| PC(38:5)                      | 0.5619 | -0.25 | 0.3282 | -0.34 |
| PC(38:5)/PC(36:5)             | 0.5619 | 0.08  | 0.7984 | -0.35 |
| PC(40:4e)                     | 0.5619 | 0.54  | 0.2345 | -0.36 |
| PE(38:3)/PE(38:2)             | 0.5619 | 0.03  | 0.8785 | -0.23 |
| PE(40:4)/PE(38:4).1           | 0.5619 | -0.16 | 0.4418 | 0.26  |
| SM(d18:1/18:1)/SM(d18:1/18:0) | 0.5619 | 0.01  | 0.7984 | 0.08  |
| SM(d18:1/26:4)                | 0.5619 | -0.21 | 0.3282 | 0.22  |
| TG(50:5)                      | 0.5619 | -0.22 | 0.1949 | 0.38  |
| TG(51:2)/TG(51:1)             | 0.5619 | -0.13 | 0.0379 | -0.40 |
| TG(51:4)                      | 0.5619 | -0.11 | 0.3282 | 0.31  |
| TG(53:2)                      | 0.5619 | 0.25  | 0.0379 | 1.28  |
| TG(54:2)/TG(54:1)             | 0.5619 | -0.26 | 0.1605 | -0.46 |
| TG(54:6)                      | 0.5619 | -0.22 | 0.2345 | 0.40  |
| TG(56:3)/TG(54:3)             | 0.5619 | 0.10  | 0.1049 | 0.34  |
| TG(56:5)/TG(56:4)             | 0.5619 | -0.56 | 0.0281 | -1.63 |
| Cer(d18:1/24:1)               | 0.5765 | -0.17 | 0.3823 | 0.41  |
| TG(50:0)                      | 0.5766 | 0.14  | 0.0281 | 2.85  |
| PC(40:5e)                     | 0.5992 | 0.02  | 0.2268 | -0.14 |
| SM(d18:1/23:0)                | 0.5993 | 0.02  | 0.5054 | 0.19  |



|                                 |        |       |        |       |
|---------------------------------|--------|-------|--------|-------|
| Cer(d18:1/22:6)                 | 0.6063 | -0.18 | 0.1605 | -0.26 |
| Cer(d18:1/23:2)                 | 0.6063 | 0.14  | 0.8785 | 0.06  |
| LysoPC(18:1)                    | 0.6063 | -0.05 | 0.6454 | 0.01  |
| LysoPC(18:2)/LysoPC(18:1)       | 0.6063 | 0.23  | 0.3282 | -0.35 |
| PC(34:1)/PC(32:1)               | 0.6063 | -0.21 | 0.0650 | -0.39 |
| PC(36:2)                        | 0.6063 | -0.20 | 0.9591 | -0.06 |
| PC(40:5)                        | 0.6063 | 0.12  | 0.0519 | 0.43  |
| PE(38:1)/PE(36:1).1             | 0.6063 | -0.03 | 0.3282 | 0.32  |
| PE(38:2)/PE(36:2).1             | 0.6063 | -0.10 | 0.8785 | -0.05 |
| PE(38:3)/PE(36:3e)              | 0.6063 | -0.13 | 0.7209 | -0.09 |
| PE(38:5)/PE(38:4).2             | 0.6063 | -0.06 | 0.0830 | -0.33 |
| SM(d18:1/24:2)                  | 0.6063 | -0.26 | 0.8785 | 0.18  |
| TG(46:2)/TG(44:2)               | 0.6063 | 0.11  | 0.7209 | -0.11 |
| TG(49:2)                        | 0.6063 | -0.32 | 0.1304 | 0.68  |
| TG(52:4)/TG(50:4)               | 0.6063 | 0.18  | 0.0030 | -0.49 |
| TG(52:5)/TG(52:4)               | 0.6063 | -0.16 | 0.1304 | 0.50  |
| TG(54:1)/TG(52:1)               | 0.6063 | 0.06  | 0.9591 | -0.17 |
| TG(56:2)/TG(54:2)               | 0.6063 | -0.04 | 0.7209 | -0.12 |
| TG(58:6)                        | 0.6063 | -0.03 | 0.1949 | 0.42  |
| PC(41:4)                        | 0.6452 | 0.02  | 0.7984 | 0.01  |
| PC(26:1e)                       | 0.6456 | -0.11 | 0.3282 | -0.15 |
| LysoPC(20:3)                    | 0.6457 | -0.06 | 0.3282 | -0.18 |
| LysoPC(18:3)/LysoPC(18:2)       | 0.6522 | -0.09 | 0.0650 | 0.49  |
| LysoPE(23:3e)                   | 0.6522 | 0.02  | 0.4606 | -0.18 |
| PC(32:1)                        | 0.6522 | 0.36  | 0.3282 | 0.34  |
| PC(36:3)/PC(34:3)               | 0.6522 | 0.04  | 0.6454 | 0.01  |
| PC(36:4)/PC(36:3)               | 0.6522 | 0.11  | 0.0650 | -0.61 |
| PC(40:6)/PC(38:6).1             | 0.6522 | 0.07  | 0.0207 | 0.41  |
| PC(40:8)/PC(40:7).1             | 0.6522 | 0.01  | 0.1949 | -0.32 |
| PE(26:6)/PE(26:5)               | 0.6522 | 0.26  | 0.2786 | -0.96 |
| PE(36:2)/PE(36:1)               | 0.6522 | 0.04  | 0.2345 | -0.29 |
| PE(38:4)/PE(38:3)               | 0.6522 | -0.04 | 0.3823 | -0.62 |
| PE(40:7)/PE(40:6).1             | 0.6522 | -0.08 | 0.7984 | -0.15 |
| PS(38:2)/PS(38:1).2             | 0.6522 | 0.47  | 0.0499 | -0.47 |
| SM(d18:1/21:0)                  | 0.6522 | 0.02  | 0.4619 | 0.24  |
| TG(50:4)/TG(48:4)               | 0.6522 | 0.02  | 0.0830 | 0.95  |
| TG(56:4)                        | 0.6522 | -0.24 | 0.0830 | 1.02  |
| DG(28:0e)                       | 0.6687 | 0.02  | 0.3170 | -0.11 |
| PC(41:4)                        | 0.6692 | 0.02  | 0.8335 | 0.01  |
| PC(34:4)                        | 0.6693 | 0.28  | 0.6454 | 0.07  |
| LysoPC(20:4)                    | 0.6694 | 0.05  | 0.2473 | 0.23  |
| MG(23:3e)                       | 0.6694 | 0.20  | 0.0515 | -0.26 |
| PI(38:4)                        | 0.6694 | 0.05  | 0.1049 | -0.74 |
| Cer(d18:1/26:1)                 | 0.6934 | -0.07 | 0.1412 | 0.44  |
| PC(41:5)                        | 0.6935 | 0.14  | 0.2072 | -0.58 |
| Cer(d18:1/26:1)/Cer(d18:1/24:1) | 0.6994 | -0.01 | 0.9591 | 0.07  |

|                               |        |       |        |       |
|-------------------------------|--------|-------|--------|-------|
| PC(32:0e)                     | 0.6994 | 0.13  | 0.1949 | -0.26 |
| PC(34:1)                      | 0.6994 | 0.13  | 0.7984 | -0.04 |
| PE(40:7)/PE(40:6)             | 0.6994 | -0.01 | 0.5737 | -0.09 |
| SM(d18:1/18:3)/SM(d18:1/18:2) | 0.6994 | 0.05  | 0.5737 | 0.05  |
| SM(d18:1/25:1)/SM(d18:1/23:1) | 0.6994 | -0.01 | 0.8785 | -0.10 |
| TG(48:0)/TG(46:0)             | 0.6994 | 0.10  | 0.3823 | 0.05  |
| TG(52:0)                      | 0.6994 | 0.31  | 0.0499 | 2.33  |
| TG(52:2)/TG(50:2).1           | 0.6994 | -0.10 | 0.2786 | -0.09 |
| TG(56:9)/TG(56:8).1           | 0.6994 | -0.25 | 0.6454 | -0.12 |
| PC(25:4)                      | 0.7178 | 0.07  | 0.3442 | 0.12  |
| TG(56:3)                      | 0.7179 | 0.24  | 0.0519 | 1.23  |
| LysoPC(18:0)/LysoPC(16:0).1   | 0.7477 | 0.03  | 0.8785 | -0.02 |
| LysoPC(18:3)/LysoPC(18:2).1   | 0.7477 | -0.11 | 0.1304 | 0.58  |
| LysoPC(20:3)/LysoPC(18:3)     | 0.7477 | 0.00  | 0.1605 | -0.26 |
| PC(34:5)/PC(32:5).1           | 0.7477 | 0.28  | 0.6454 | -0.08 |
| PC(36:5)                      | 0.7477 | -0.22 | 0.7209 | 0.25  |
| PC(38:6)/PC(38:5)             | 0.7477 | 0.04  | 1.0000 | -0.05 |
| PC(41:5)/PC(41:4).1           | 0.7477 | 0.13  | 0.2786 | -0.61 |
| PE(36:2)/PE(36:1).1           | 0.7477 | -0.18 | 0.7209 | 0.34  |
| PE(38:3)/PE(36:3)             | 0.7477 | -0.17 | 0.3823 | 0.33  |
| PE(40:0e)                     | 0.7477 | -0.07 | 0.3282 | 0.95  |
| PE(40:4)/PE(38:4).3           | 0.7477 | -0.02 | 1.0000 | 0.02  |
| SM(d18:1/16:0)/SM(d18:1/14:0) | 0.7477 | 0.02  | 0.3282 | -0.16 |
| SM(d18:1/18:0)/SM(d18:1/16:0) | 0.7477 | -0.07 | 0.3282 | -0.12 |
| SM(d18:1/23:0)/SM(d18:1/21:0) | 0.7477 | -0.02 | 1.0000 | -0.04 |
| SM(d18:1/24:1)                | 0.7477 | -0.25 | 0.4418 | 0.15  |
| TG(52:2)                      | 0.7477 | 0.09  | 0.2345 | 0.69  |
| TG(52:4)                      | 0.7477 | -0.22 | 0.3282 | 0.27  |
| TG(54:6)/TG(54:5)             | 0.7477 | 0.04  | 0.6454 | 0.01  |
| TG(58:8)/TG(56:8)             | 0.7477 | -0.04 | 0.2786 | -0.21 |
| MG(25:6e)                     | 0.7676 | -0.09 | 0.0650 | -0.41 |
| PC(40:4)                      | 0.7676 | -0.02 | 0.5283 | 0.21  |
| PI(38:3)                      | 0.7676 | 0.31  | 0.1031 | -0.83 |
| TG(53:3)                      | 0.7676 | 0.00  | 0.0830 | 1.10  |
| LysoPC(18:1)/LysoPC(18:0)     | 0.7969 | 0.04  | 0.1605 | -0.14 |
| LysoPC(18:2)                  | 0.7969 | 0.02  | 0.2786 | -0.22 |
| PC(34:3)/PC(34:2)             | 0.7969 | 0.25  | 0.1605 | 0.31  |
| PC(36:1)/PC(34:1)             | 0.7969 | -0.17 | 0.1605 | 0.24  |
| PC(36:5)/PC(34:5)             | 0.7969 | -0.02 | 0.8785 | 0.16  |
| PC(38:3)                      | 0.7969 | 0.15  | 0.1605 | 0.43  |
| PC(40:4)/PC(38:4)             | 0.7969 | 0.06  | 0.2786 | -0.60 |
| PE(26:6)/PE(26:5).1           | 0.7969 | -0.25 | 0.0830 | -1.25 |
| PE(36:1)/PE(36:0)             | 0.7969 | 0.17  | 0.5054 | 0.06  |
| PE(38:4)/PE(38:3).2           | 0.7969 | 0.20  | 0.7984 | 0.06  |
| SM(d18:1/18:1)/SM(d18:1/16:1) | 0.7969 | 0.00  | 0.0650 | -0.28 |
| SM(d18:1/22:0)                | 0.7969 | -0.19 | 0.3823 | 0.34  |

|                               |        |       |        |       |
|-------------------------------|--------|-------|--------|-------|
| TG(44:1)/TG(44:0)             | 0.7969 | -0.02 | 0.1605 | 0.26  |
| TG(46:0)/TG(44:0)             | 0.7969 | 0.02  | 0.5737 | 0.04  |
| TG(46:1)                      | 0.7969 | -0.22 | 0.0499 | 2.16  |
| TG(48:2)                      | 0.7969 | 0.42  | 0.1304 | 1.33  |
| TG(51:4)/TG(51:3)             | 0.7969 | -0.06 | 0.2345 | -0.20 |
| TG(54:4)                      | 0.7969 | -0.16 | 0.5737 | 0.37  |
| TG(54:4)                      | 0.7969 | -0.16 | 0.9591 | 0.20  |
| PC(40:5)                      | 0.8182 | -0.01 | 0.6742 | 0.08  |
| DG(31:2)                      | 0.8423 | 0.42  | 0.8785 | 0.01  |
| PG(34:2)                      | 0.8435 | -0.06 | 1.0000 | 0.07  |
| PE(30:1e)                     | 0.8438 | 0.37  | 0.0499 | -0.37 |
| PS(40:6e)                     | 0.8438 | -0.02 | 0.9581 | -0.06 |
| TG(51:2)                      | 0.8438 | 0.57  | 0.0379 | 1.41  |
| Cer(d18:1/24:0)               | 0.8470 | 0.00  | 0.6454 | 0.28  |
| PC(27:5)                      | 0.8470 | -0.07 | 0.5283 | -0.12 |
| PC(38:6)                      | 0.8470 | -0.01 | 0.5737 | -0.11 |
| PC(38:6)/PC(38:5).1           | 0.8470 | 0.05  | 0.3823 | 0.80  |
| PE(38:1)/PE(36:1)             | 0.8470 | 0.00  | 0.7984 | -0.05 |
| SM(d18:1/26:4)/SM(d18:1/24:4) | 0.8470 | -0.20 | 0.5737 | 0.04  |
| TG(48:0)                      | 0.8470 | -0.18 | 0.0281 | 2.47  |
| TG(50:2)                      | 0.8470 | 0.28  | 0.1949 | 0.65  |
| TG(50:3)/TG(48:3)             | 0.8470 | 0.01  | 0.2345 | -0.43 |
| TG(50:4)                      | 0.8470 | -0.05 | 0.1304 | 0.76  |
| TG(52:3)/TG(50:3)             | 0.8470 | 0.03  | 0.2786 | -0.24 |
| TG(54:5)                      | 0.8470 | 0.16  | 0.2345 | 0.42  |
| TG(56:8)/TG(54:8)             | 0.8470 | 0.05  | 0.4418 | 0.29  |
| PC(27:3)                      | 0.8692 | -0.12 | 0.5280 | 0.22  |
| SM(d18:1/21:2)                | 0.8693 | 0.00  | 0.4418 | -0.21 |
| LysoPE(18:4e)                 | 0.8696 | -0.20 | 0.0148 | -0.15 |
| PE(40:3)                      | 0.8696 | 0.05  | 0.2786 | -0.23 |
| TG(54:3)                      | 0.8696 | -0.02 | 0.5054 | 0.66  |
| SM(d18:1/23:3)                | 0.8954 | 0.09  | 0.6360 | 0.50  |
| PG(36:2)                      | 0.8954 | 0.00  | 0.8334 | 0.09  |
| Cer(d18:1/23:0)               | 0.8955 | 0.09  | 0.3282 | 0.38  |
| TG(42:1)                      | 0.8955 | 0.00  | 0.1149 | 2.49  |
| PC(38:7)                      | 0.8955 | 0.06  | 0.6740 | -0.39 |
| SM(d18:1/24:4)                | 0.8955 | 0.06  | 1.0000 | 0.03  |
| LysoPC(16:0)                  | 0.8977 | 0.18  | 0.5737 | 0.01  |
| LysoPC(20:5)                  | 0.8977 | -0.02 | 0.9591 | -0.04 |
| PC(36:1)                      | 0.8977 | -0.06 | 0.5737 | 0.14  |
| PC(36:3)                      | 0.8977 | 0.11  | 0.5054 | 0.14  |
| PC(36:4)                      | 0.8977 | -0.13 | 0.1949 | -0.36 |
| PC(38:2)                      | 0.8977 | -0.07 | 0.1605 | 0.30  |
| PE(40:4)/PE(38:4).2           | 0.8977 | 0.29  | 0.7209 | -0.13 |
| PS(41:7)/PS(41:6)             | 0.8977 | -0.02 | 0.5737 | -0.49 |
| SM(d18:1/24:2)/SM(d18:1/24:1) | 0.8977 | 0.01  | 0.6454 | 0.08  |

|                               |        |       |        |       |
|-------------------------------|--------|-------|--------|-------|
| TG(44:1)                      | 0.8977 | -0.29 | 0.0499 | 2.25  |
| TG(46:0)                      | 0.8977 | -0.26 | 0.0281 | 2.13  |
| TG(48:3)                      | 0.8977 | 0.19  | 0.0829 | 1.41  |
| TG(50:3)                      | 0.8977 | -0.01 | 0.4418 | 0.25  |
| TG(50:4)/TG(50:3)             | 0.8977 | 0.11  | 0.0379 | 0.36  |
| TG(54:4)/TG(52:4)             | 0.8977 | -0.16 | 0.7209 | -0.14 |
| TG(54:5)/TG(52:5)             | 0.8977 | -0.09 | 0.2345 | -0.28 |
| TG(56:9)/TG(56:8)             | 0.8977 | -0.14 | 0.6454 | -0.12 |
| TG(58:7)/TG(56:7).1           | 0.8977 | -0.07 | 0.5054 | -0.08 |
| PG(36:4)                      | 0.9215 | 0.10  | 0.4418 | 0.15  |
| PC(40:6)                      | 0.9215 | -0.09 | 0.5737 | 0.14  |
| TG(42:0)                      | 0.9215 | -0.34 | 0.1949 | 1.77  |
| Cer(d18:1/22:0)               | 0.9476 | -0.14 | 0.3282 | 0.22  |
| PC(40:8)                      | 0.9476 | 0.11  | 0.1605 | -0.22 |
| PC(40:8)                      | 0.9476 | -0.02 | 0.1605 | -0.22 |
| LysoPC(18:0)/LysoPC(16:0)     | 0.9487 | -0.08 | 0.8785 | -0.09 |
| LysoPC(20:4)/LysoPC(20:3)     | 0.9487 | -0.04 | 0.3823 | 0.11  |
| LysoPC(20:5)/LysoPC(20:4)     | 0.9487 | 0.12  | 0.6454 | -0.10 |
| PC(34:2)/PC(32:2)             | 0.9487 | -0.09 | 0.2345 | -0.29 |
| PC(38:3)/PC(38:2)             | 0.9487 | -0.02 | 0.5054 | -0.23 |
| PC(38:4)/PC(36:4).1           | 0.9487 | 0.02  | 1.0000 | 0.04  |
| PC(38:6)/PC(36:6)             | 0.9487 | -0.06 | 0.9591 | 0.21  |
| PC(38:7)/PC(38:6).1           | 0.9487 | 0.00  | 0.8785 | 0.14  |
| PC(40:5)/PC(40:4).1           | 0.9487 | -0.39 | 0.7128 | -0.15 |
| PC(41:5)/PC(41:4)             | 0.9487 | 0.12  | 0.2345 | -0.58 |
| PE(34:6e)                     | 0.9487 | 0.11  | 0.7209 | 0.13  |
| PE(38:2)/PE(38:1)             | 0.9487 | 0.00  | 0.5054 | -0.10 |
| PE(38:4)/PE(38:3).1           | 0.9487 | -0.24 | 0.2786 | -0.47 |
| PE(38:6)/PE(38:5).1           | 0.9487 | 0.03  | 0.1049 | 0.90  |
| SM(d18:1/17:0)/SM(d18:1/15:0) | 0.9487 | -0.05 | 0.7984 | -0.07 |
| SM(d18:1/23:1)                | 0.9487 | 0.10  | 0.6742 | 0.37  |
| TG(44:2)/TG(44:1)             | 0.9487 | -0.06 | 0.0207 | -0.37 |
| TG(48:1)/TG(46:1)             | 0.9487 | 0.02  | 0.7209 | 0.19  |
| TG(48:2)/TG(46:2)             | 0.9487 | 0.18  | 0.2786 | -0.36 |
| TG(52:0)/TG(50:0)             | 0.9487 | -0.07 | 0.0830 | -0.49 |
| TG(52:1)/TG(50:1)             | 0.9487 | -0.08 | 0.1605 | 0.31  |
| TG(54:5)/TG(54:4)             | 0.9487 | 0.16  | 0.5054 | 0.32  |
| TG(54:5)/TG(54:4).1           | 0.9487 | 0.16  | 0.2786 | 0.37  |
| TG(58:9)/TG(56:9)             | 0.9487 | 0.16  | 0.2786 | -0.22 |
| PC(40:4e)                     | 0.9738 | 0.20  | 0.0512 | -0.39 |
| TG(44:0)                      | 0.9738 | -0.05 | 0.0650 | 2.01  |
| Cer(d18:1/11:0)               | 1.0000 | 0.22  | 0.9591 | -0.09 |
| LysoPE(20:0)                  | 1.0000 | -0.08 | 0.7924 | -0.10 |
| PA(36:4)                      | 1.0000 | 0.00  | 0.3282 | -0.06 |
| PC(32:2)                      | 1.0000 | -0.16 | 0.4418 | -0.04 |
| PC(34:2)                      | 1.0000 | -0.02 | 0.7984 | -0.16 |

|                   |        |       |        |       |
|-------------------|--------|-------|--------|-------|
| PC(34:3)          | 1.0000 | -0.09 | 0.4418 | 0.27  |
| PC(38:3)/PC(36:3) | 1.0000 | 0.05  | 0.1605 | 0.16  |
| PE(36:0)/PE(34:0) | 1.0000 | -0.06 | 1.0000 | 0.02  |
| PS(27:6)/PS(27:5) | 1.0000 | 0.08  | 0.7209 | 0.01  |
| PS(31:0e)         | 1.0000 | 0.10  | 0.4418 | -0.13 |
| TG(44:2)          | 1.0000 | -0.19 | 0.1304 | 2.01  |
| TG(46:2)          | 1.0000 | -0.17 | 0.0650 | 1.84  |
| TG(49:1)          | 1.0000 | -0.05 | 0.0281 | 1.62  |
| TG(52:3)          | 1.0000 | -0.28 | 0.3823 | 0.25  |
| TG(52:4)/TG(52:3) | 1.0000 | 0.05  | 0.7209 | 0.02  |
| TG(53:4)/TG(51:4) | 1.0000 | 0.00  | 0.4418 | 0.09  |
